# Supplementary material
Source: PubMed Central journal article supplement (PMC3793390)

**A Genetic Variant Creating a Novel Interferon Analog (IFNAN) Protein is Associated with Impaired Clearance of Hepatitis C Virus**

**Supplementary Fig. 1.** DNA and protein sequence analysis of the regions upstream of the *IL28A* and *IL28B* genes. Identical nucleotides and amino acids are shaded in black. The location of ss469415590 is marked by a red bar.

**a.** Alignment of DNA sequences shows multiple mismatches between regions upstream of *IL28A* and *IL28B* genes. Protein translation is based on sequences upstream of *IL28B* gene; M (Met) marks first amino acid of predicted proteins.

**b.** The region upstream of *IL28A* is predicted to generate a protein fragment of 49 aa invariably terminated by a stop codon and expected to be degraded by nonsense-mediated decay. The region upstream of *IL28B* gene is predicted to produce several full-length protein isoforms depending on alleles of ss469415590,  $\Delta G$  and TT ( $\Delta C$  and AA based on complementary DNA strand). The open reading frames and the identity of these proteins depend on ss469415590, a frame-shift variant at amino acid 22.

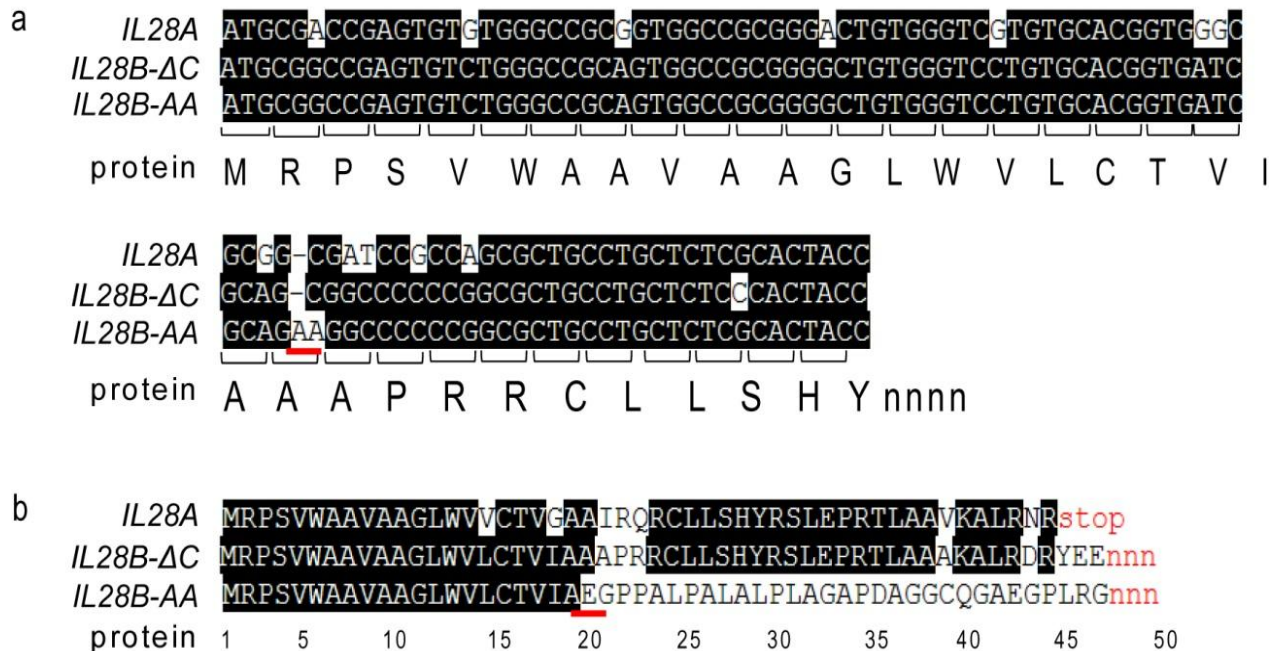

## Supplementary Fig. 2. Sequence and genetic variants in *IFNAN* gene

### Transcription start site

**Gtt**gccaggtggagacggctctggacgcctcccaggggacagtggacggcagcacctgctgcagcacgagggcacagagg  
rs186768149 rs4803222

gtgcaactgcagacaggagtgagggcagaggccaaggcgag **[G/A]** agggggccggctcccactctct **[C/G]** tcccactg  
tgtgtgctgtgccttcacgctccgagcattgccttccctgggatcctaaccgaaggcgggggctggacgcgctggacc  
tctctttggcttccctgacgtctctcgctgctgcagaagcagag

Exon 1 rs150891559, Ala11Ala rs73555604, Cys17Tyr ss469415590  
**ATG**CGGCCGAGTGTCTGGGCCGAGTGGCC**GC [G/A]**GGGCTGTGGGTCTGT**[G/A]**CACGGTGATCGCAG**GC [TT/-G]**GCCC  
rs4803221, Ser30Ser  
CCCGGCGCTGCCTGC**TTC [G/C]**CACTACCGCTCGCTGGAGCCCCGGACGCTGGCGGCTGCCAAGGCGCTGAGGGACCGCTAC

Intron 1 rs117436747  
gtaagtcaccgcccagccccctgtgccccctgggaccctggccccacc **[G/A]** ggttcccatacaccggttctctgtcccagg  
gtcctgctcctagcggccagcaggcgcctctcctatgtcagcggccacaattcccaccagagacccccgcagtccccgctg  
tcagcgcgaacgcaggctcagggtcaatcacagaaggagccctgcccggaggactcggctccaggctcggggcgaggggctt  
rs12979860  
gctgggggagcgcggagtgcaattcaaccctggttc **[G/A]** cgcttcggggagctccctggttcagtacacgacaggcacga  
rs181637919  
c **[C/T]** gtgcgctgccagtaccatccacgtccaggaatccagactgtgcagaggttaggggcccctggcgagggggcctagc  
cgtatgcgataagcgcgcttgtcccgcag

Exon 2 (alternative) rs142981501, Arg60Pro rs117648444, Pro70Ser  
GAGGAAGAGGCGCTGAGCTGGGGGCAG**C [G/C]**CAACTGCTCCTTCCGCCCCAGGAGGGAT **[C/T]**CTCCGCGGCCATCC

Intron 2  
gtgaggcccgggagtgggcgggagagggcatggcccgggcgcccgcctcctaacgcctctcgtccccgcag

Exon 3 (alternative)  
TCCTGCGCTCGGCTCCGCCACGTGGCCCGGGGCATCGCGGACGCCAGGCAGTGCCTCAGCGGCTGCACCGCTCGGAGCTGCT  
CCCCGGCGCCGGCCCGATCCTGGAGCTGCTGGCGGCCGCGGGGAGGGATGTGGCGGCCTGC

Intron 3  
rs112794654 rs111531283  
gtgag **[T/C]** gacggcgcgccccgcgccectc **[T/G]** cccccgcagcttctctgcatecctcaggccccagggcagcccc  
rs143958949  
gcgctttgccaatctgtcctgcttagcggaaaaaccatccagac **[C/A]** ggagtcgggtcctctgggtgtcctgaaatccgg  
gctcgagtctgcggctgggagggccacgggcagatgcagagaggggcttcgtccttcgcttttccatttgctcatgtccca  
ctccag

Exon 4  
CTTGAGCTGGCACGGCCAGGCTCCTCCAGGAAGGTCCCCGGGGCCAGAAGAGGCGTCAAAACCCCGGAGAGCG

Intron 4 rs77811741  
gtgagtgaacaggcaatacagg **[G/T]** ttagcccgcagggaggaccaggcggaggtgacaaggacgggactgaggctgcgag  
cagcgggactggagggggattccgggggcccgggggaagagcctggcttagccccgctgcctccctccctggctccag

Exon 5  
rs12971396, Ser149Ser rs149445319, Leu171Leu  
GAC**TC [G/C]**CCTCGGTGCCGAAAGCCAGCGTGGTCTTCAACCTCCTGCGCCTGCTCACGTGGGAG**CT [C/T]**CGGCTGGCT  
rs137902769, Ser175Ser  
GCACAC**TC [T/A]**GGGCCTTGCCCT**TGA**

ccccgccccctctggcagcacggaacctccagccattggctgccgaaagcagct **[C/G]** ctgt **[C/G]** gtccattgggc

**Supplementary Fig. 3** Analysis of *IFNAN* variants based on Sanger sequencing and TaqMan genotyping of HapMap samples.

| variants        | SNP ID       | alleles | annotation                                  | Allele 1 | Allele 1 frequencies in HapMap samples |       |         |
|-----------------|--------------|---------|---------------------------------------------|----------|----------------------------------------|-------|---------|
|                 |              |         |                                             |          | CEU                                    | YRI   | CHB/JPT |
| IFNAN, upstream | rs7248668    | A/G     | 4,602 bp upstream of translation start      | A        | 0.183                                  | 0.025 | 0.056   |
| IFNAN, upstream | rs8099917    | T/G     | 3,946 bp upstream of translation start      | G        | 0.183                                  | 0.025 | 0.061   |
| IFNAN, upstream | rs8109886    | A/C     | 3,543 bp upstream of translation start      | A        | 0.422                                  | 0.864 | 0.073   |
| IFNAN, upstream | rs10853727   | T/C     | 1,244 bp upstream of translation start      | C        | 0.108                                  | 0.108 | 0.006   |
| IFNAN, 5'UTR    | rs4803222    | G/C     | 5'UTR, 134 bp upstream of translation start | C        | 0.305                                  | 0.305 | 0.067   |
| IFNAN, ex1      | rs150891559  | A/G     | Ala11Ala                                    | T        | 0.008                                  | 0     | 0       |
| IFNAN, ex1      | rs73555604   | A/G     | Cys17Tyr                                    | T        | 0.017                                  | 0.275 | 0       |
| IFNAN, ex1      | ss469415590  | ΔG/TT   | Ala22/no IFNAN                              | ΔG       | 0.314                                  | 0.767 | 0.067   |
| IFNAN, ex1      | rs4803221    | G/C     | Ser30Ser                                    | G        | 0.186                                  | 0.192 | 0.056   |
| IFNAN, intron1  | rs12979860   | C/T     | intron 1                                    | T        | 0.317                                  | 0.700 | 0.067   |
| IFNAN, ex2      | rs142981501  | C/G     | Pro60Arg                                    | C        | 0                                      | 0.042 | 0       |
| IFNAN, ex2      | rs117648444  | T/C     | Pro70Ser                                    | T        | 0.102                                  | 0.100 | 0.001   |
| IFNAN, ex5      | rs12971396   | C/G     | Ser149Ser                                   | C        | 0.205                                  | 0.192 | 0.062   |
| IFNAN, ex5      | rs149445319* | C/T     | Leu171Leu                                   | T        | 0                                      | 0     | 0       |
| IFNAN, ex5      | rs137902769  | T/A     | Ser175Ser                                   | A        | 0                                      | 0.133 | 0       |
| IL28B, 5'UTR    | rs28416813   | G/C     | 5'UTR                                       | G        | 0.325                                  | 0.683 | 0.063   |
| IL28B, ex2      | rs8103142    | C/T     | Lys70Arg                                    | C        | 0.325                                  | 0.711 | 0       |

\* - reported in dbSNP based on 1000 Genomes but found monomorphic by Sanger sequencing.

**Supplementary Fig. 4.** Analysis of pair-wise linkage disequilibrium ( $r^2$ ) within *IL28B/IFNAN* region in HapMap samples from Europeans (CEU), West-Africans (YRI) and Asians - Chinese (CHB) and Japanese (JPT). Monomorphic markers are highlighted in light-gray.

| HapMap, CEU<br>N=90 | Markers     | rs7248668 | rs8099917 | rs8109886 | rs10853727 | rs4803222 | rs150891559 | rs73555604 | ss469415590 | rs4803221 | rs12979860 | rs142981501 | rs117648444 | rs12971396 | rs149445319 | rs137902769 | rs28416813 | rs8103142 |
|---------------------|-------------|-----------|-----------|-----------|------------|-----------|-------------|------------|-------------|-----------|------------|-------------|-------------|------------|-------------|-------------|------------|-----------|
| IFNAN, upstream     | rs7248668   |           |           |           |            |           |             |            |             |           |            |             |             |            |             |             |            |           |
| IFNAN, upstream     | rs8099917   | 1.000     |           |           |            |           |             |            |             |           |            |             |             |            |             |             |            |           |
| IFNAN, upstream     | rs8109886   | 0.217     | 0.320     |           |            |           |             |            |             |           |            |             |             |            |             |             |            |           |
| IFNAN, upstream     | rs10853727  | 0.017     | 0.027     | 0.158     |            |           |             |            |             |           |            |             |             |            |             |             |            |           |
| IFNAN, 5'UTR        | rs4803222   | 0.393     | 0.522     | 0.609     | 0.282      |           |             |            |             |           |            |             |             |            |             |             |            |           |
| IFNAN, ex1          | rs150891559 | 0.001     | 0.002     | 0.012     | 0.001      | 0.004     |             |            |             |           |            |             |             |            |             |             |            |           |
| IFNAN, ex1          | rs73555604  | 0.002     | 0.004     | 0.025     | 0.002      | 0.008     | 0.496       |            |             |           |            |             |             |            |             |             |            |           |
| IFNAN, ex1          | ss469415590 | 0.356     | 0.435     | 0.635     | 0.271      | 0.885     | 0.019       | 0.038      |             |           |            |             |             |            |             |             |            |           |
| IFNAN, ex1          | rs4803221   | 0.820     | 0.891     | 0.329     | 0.028      | 0.522     | 0.002       | 0.004      | 0.435       |           |            |             |             |            |             |             |            |           |
| IFNAN, intron1      | rs12979860  | 0.341     | 0.420     | 0.640     | 0.262      | 0.885     | 0.019       | 0.038      | 0.923       | 0.435     |            |             |             |            |             |             |            |           |
| IFNAN, ex2          | rs142981501 |           |           |           |            |           |             |            |             |           |            |             |             |            |             |             |            |           |
| IFNAN, ex2          | rs117648444 | 0.015     | 0.008     | 0.152     | 0.823      | 0.267     | 0.001       | 0.002      | 0.256       | 0.005     | 0.248      |             |             |            |             |             |            |           |
| IFNAN, ex5          | rs12971396  | 0.913     | 0.946     | 0.394     | 0.028      | 0.593     | 0.002       | 0.005      | 0.497       | 0.946     | 0.497      | 0.007       |             |            |             |             |            |           |
| IFNAN, ex5          | rs149445319 |           |           |           |            |           |             |            |             |           |            |             |             |            |             |             |            |           |
| IFNAN, ex5          | rs137902769 |           |           |           |            |           |             |            |             |           |            |             |             |            |             |             |            |           |
| IL28B, 5'UTR        | rs28416813  | 0.341     | 0.466     | 0.666     | 0.252      | 0.924     | 0.018       | 0.036      | 0.962       | 0.482     | 0.962      |             | 0.238       | 0.546      |             |             |            |           |
| IL28B, ex2          | rs8103142   | 0.341     | 0.466     | 0.666     | 0.197      | 0.850     | 0.018       | 0.036      | 0.886       | 0.482     | 0.962      |             | 0.182       | 0.546      |             |             | 0.925      |           |

| HapMap, YRI<br>N=90 | Markers     | rs7248668       | rs8099917 | rs8109886 | rs10853727 | rs4803222 | rs150891559 | rs73555604 | ss469415590 | rs4803221 | rs12979860 | rs142981501 | rs117648444 | rs12971396 | rs149445319 | rs137902769 | rs28416813 | rs8103142 |
|---------------------|-------------|-----------------|-----------|-----------|------------|-----------|-------------|------------|-------------|-----------|------------|-------------|-------------|------------|-------------|-------------|------------|-----------|
|                     |             | IFNAN, upstream | rs7248668 |           |            |           |             |            |             |           |            |             |             |            |             |             |            |           |
| IFNAN, upstream     | rs8099917   | 1.000           |           |           |            |           |             |            |             |           |            |             |             |            |             |             |            |           |
| IFNAN, upstream     | rs8109886   | 0.003           | 0.004     |           |            |           |             |            |             |           |            |             |             |            |             |             |            |           |
| IFNAN, upstream     | rs10853727  | 0.002           | 0.003     | 0.019     |            |           |             |            |             |           |            |             |             |            |             |             |            |           |
| IFNAN, 5'UTR        | rs4803222   | 0.041           | 0.059     | 0.069     | 0.282      |           |             |            |             |           |            |             |             |            |             |             |            |           |
| IFNAN, ex1          | rs150891559 |                 |           |           |            |           |             |            |             |           |            |             |             |            |             |             |            |           |
| IFNAN, ex1          | rs73555604  | 0.000           | 0.010     | 0.058     | 0.046      | 0.170     |             |            |             |           |            |             |             |            |             |             |            |           |
| IFNAN, ex1          | ss469415590 | 0.005           | 0.008     | 0.504     | 0.037      | 0.130     |             | 0.115      |             |           |            |             |             |            |             |             |            |           |
| IFNAN, ex1          | rs4803221   | 0.075           | 0.108     | 0.036     | 0.029      | 0.551     |             | 0.090      | 0.072       |           |            |             |             |            |             |             |            |           |
| IFNAN, intron1      | rs12979860  | 0.008           | 0.011     | 0.357     | 0.052      | 0.178     |             | 0.163      | 0.710       | 0.102     |            |             |             |            |             |             |            |           |
| IFNAN, ex2          | rs142981501 | 0.001           | 0.001     | 0.007     | 0.005      | 0.101     |             | 0.016      | 0.013       | 0.100     | 0.019      |             |             |            |             |             |            |           |
| IFNAN, ex2          | rs117648444 | 0.002           | 0.003     | 0.018     | 0.915      | 0.258     |             | 0.042      | 0.034       | 0.026     | 0.048      | 0.005       |             |            |             |             |            |           |
| IFNAN, ex5          | rs12971396  | 0.075           | 0.108     | 0.036     | 0.029      | 0.551     |             | 0.090      | 0.072       | 1.000     | 0.102      | 0.100       | 0.026       |            |             |             |            |           |
| IFNAN, ex5          | rs149445319 |                 |           |           |            |           |             |            |             |           |            |             |             |            |             |             |            |           |
| IFNAN, ex5          | rs137902769 | 0.003           | 0.004     | 0.023     | 0.019      | 0.069     |             | 0.406      | 0.047       | 0.036     | 0.066      | 0.007       | 0.017       | 0.036      |             |             |            |           |
| IL28B, 5'UTR        | rs28416813  | 0.008           | 0.011     | 0.276     | 0.030      | 0.142     |             | 0.172      | 0.628       | 0.101     | 0.880      | 0.019       | 0.050       | 0.101      |             | 0.069       |            |           |
| IL28B, ex2          | rs8103142   | 0.007           | 0.011     | 0.301     | 0.023      | 0.133     |             | 0.158      | 0.610       | 0.093     | 0.800      | 0.018       | 0.046       | 0.093      |             | 0.064       | 0.920      |           |

| HapMap, CHB/JPT<br>N=90 | Markers     | rs7248668       | rs8099917 | rs8109886 | rs10853727 | rs4803222 | rs150891559 | rs73555604 | ss469415590 | rs4803221 | rs12979860 | rs142981501 | rs117648444 | rs12971396 | rs149445319 | rs137902769 | rs28416813 | rs8103142 |
|-------------------------|-------------|-----------------|-----------|-----------|------------|-----------|-------------|------------|-------------|-----------|------------|-------------|-------------|------------|-------------|-------------|------------|-----------|
|                         |             | IFNAN, upstream | rs7248668 |           |            |           |             |            |             |           |            |             |             |            |             |             |            |           |
| IFNAN, upstream         | rs8099917   | 1.000           |           |           |            |           |             |            |             |           |            |             |             |            |             |             |            |           |
| IFNAN, upstream         | rs8109886   | 0.823           | 0.836     |           |            |           |             |            |             |           |            |             |             |            |             |             |            |           |
| IFNAN, upstream         | rs10853727  |                 |           |           |            |           |             |            |             |           |            |             |             |            |             |             |            |           |
| IFNAN, 5'UTR            | rs4803222   | 0.904           | 0.911     | 0.918     |            |           |             |            |             |           |            |             |             |            |             |             |            |           |
| IFNAN, ex1              | rs150891559 |                 |           |           |            |           |             |            |             |           |            |             |             |            |             |             |            |           |
| IFNAN, ex1              | rs73555604  |                 |           |           |            |           |             |            |             |           |            |             |             |            |             |             |            |           |
| IFNAN, ex1              | ss469415590 | 0.904           | 0.911     | 0.918     |            | 1.000     |             |            |             |           |            |             |             |            |             |             |            |           |
| IFNAN, ex1              | rs4803221   | 0.895           | 0.904     | 0.755     |            | 0.824     |             |            | 0.824       |           |            |             |             |            |             |             |            |           |
| IFNAN, intron1          | rs12979860  | 0.904           | 0.911     | 0.918     |            | 1.000     |             |            | 1.000       | 0.824     |            |             |             |            |             |             |            |           |
| IFNAN, ex2              | rs142981501 |                 |           |           |            |           |             |            |             |           |            |             |             |            |             |             |            |           |
| IFNAN, ex2              | rs117648444 |                 |           |           |            |           |             |            |             |           |            |             |             |            |             |             |            |           |
| IFNAN, ex5              | rs12971396  | 1.000           | 1.000     | 0.836     |            | 0.911     |             |            | 0.911       | 0.904     | 0.911      |             |             |            |             |             |            |           |
| IFNAN, ex5              | rs149445319 |                 |           |           |            |           |             |            |             |           |            |             |             |            |             |             |            |           |
| IFNAN, ex5              | rs137902769 |                 |           |           |            |           |             |            |             |           |            |             |             |            |             |             |            |           |
| IL28B, 5'UTR            | rs28416813  | 1.000           | 1.000     | 0.836     |            | 0.911     |             |            | 0.911       | 0.904     | 0.911      |             |             | 1.000      |             |             |            |           |
| IL28B, ex2              | rs8103142   | 0.904           | 0.911     | 0.918     |            | 1.000     |             |            | 1.000       | 0.824     | 1.000      |             |             | 0.911      |             |             | 0.911      |           |

**Supplementary Fig. 5.** Haplotype analysis in the *IL28B/IFNAN* region in HapMap samples and participants of Virahep C study. Sustained virological response (SVR) was used as pegIFN- $\alpha$ /RBV therapy treatment outcome (responders/non-responders). Bold underlined are markers included in the haplotype analysis of SVR by Smith et. al, 2011., \* - 8 markers used in the final haplotype analysis in HapMap and Virahep-C samples. In yellow – the unfavorable haplotypes based on studies in Europeans and Asians, and their extrapolation in Africans; in grey – a common favorable haplotype shared by all populations. Highlighted bold underlined are non-synonymous variants within *IFNAN* found on the background of unfavorable haplotypes. Genotypes of *IFNAN* markers were determined by Sanger sequencing; no other coding variants were identified in these samples. EA- European-Americans; AA- African-Americans. Haplotype frequencies in all groups (HapMap and responders/non-responders) are indicated as %.

| location             | IL28B             |                                         |            | IFNAN          |                |               |               |                    |                   |              |                | upstream of IFNAN |                   |                  |                   | % in HapMap      | Based on Smith et al, Genome Medicine, 2011, Table 2 |             |                               |                               | Virahep-C |             |         |
|----------------------|-------------------|-----------------------------------------|------------|----------------|----------------|---------------|---------------|--------------------|-------------------|--------------|----------------|-------------------|-------------------|------------------|-------------------|------------------|------------------------------------------------------|-------------|-------------------------------|-------------------------------|-----------|-------------|---------|
|                      | intron 2          | Lys70Arg                                | 5'UTR      | Ser175Ser, ex5 | Ser149Ser, ex5 | Pro70Ser, ex2 | Arg60Pro, ex2 | intron 1           | Ser30Ser, ex1     | Indel, ex1   | Cys177Tyr, ex1 | 5'UTR             | intergenic        | intergenic       | intergenic        |                  | intergenic                                           | n=819       | EA: n=93 resp; n=85 non-resp; | AA: n=43 resp; n=112 non-resp |           |             |         |
| variant              | <u>rs11881222</u> | <u>rs8103142</u>                        | rs28416813 | rs137902769    | rs12971396*    | rs11764844*   | rs142981501*  | <u>rs12979860*</u> | <u>rs4803221*</u> | ss469415590* | rs73555604*    | rs4803222         | <u>rs10853727</u> | <u>rs8109886</u> | <u>rs8099917*</u> | <u>rs7248668</u> | resp, %                                              | non-resp, % | p-value                       | OR, 95%CI                     | resp, %   | non-resp, % | p-value |
| CEU<br>n=90          | G C G             | T C C G T G <b>ΔG</b> C C               | T A G A    | 15.3           | 16.5           | 30.4          | 9.51E-11      | 2.20(1.72-2.80)    | 14.5              | 24.1         | ref            |                   |                   |                  |                   |                  |                                                      |             |                               |                               |           |             |         |
|                      | G C G             | T G <b>I</b> G T C <b>ΔG</b> C C        | C A T G    | 9.3            | 10.1           | 10.6          | 0.77          | 1.04(0.75-1.43)    | 5.9               | 13.5         | 0.43           |                   |                   |                  |                   |                  |                                                      |             |                               |                               |           |             |         |
|                      | A/G C G           | T G C G T C <b>ΔG</b> <b>I</b> G        | T A T G    | 1.7            | 1.1            | 1.6           | 0.39          | 1.49 (0.62-3.56)   | 4.3               | 2.9          | 0.20           |                   |                   |                  |                   |                  |                                                      |             |                               |                               |           |             |         |
|                      | A T C             | T G C G C C <b>TT</b> C G               | T C T G    | 57.3           | 48.4           | 39.6          | 4.00E-04      | 0.70(0.57-0.85)    | 74.7              | 58.2         | 0.011          |                   |                   |                  |                   |                  |                                                      |             |                               |                               |           |             |         |
| YRI<br>n=90          | A C G             | T/A G C G T C <b>ΔG</b> <b>I</b> G      | T A T G    | 24.8           |                |               |               |                    |                   |              |                |                   |                   |                  |                   |                  |                                                      |             |                               |                               |           |             |         |
|                      | G C G             | T C C G T <b>G</b> <b>ΔG</b> C C        | T A T G    | 15.2           |                |               |               |                    |                   |              |                |                   |                   |                  |                   |                  |                                                      |             |                               |                               |           |             |         |
|                      | G C G             | T G <b>I</b> G T C <b>ΔG</b> C C        | C A T G    | 10.0           |                |               |               |                    |                   |              |                |                   |                   |                  |                   |                  |                                                      |             |                               |                               |           |             |         |
|                      | A/G C G           | T G C G T C <b>ΔG</b> C G               | T A T G    | 11.6           |                |               |               |                    |                   |              |                |                   |                   |                  |                   |                  |                                                      |             |                               |                               |           |             |         |
|                      | A <b>I</b> C      | T G C G C C <b>ΔG</b> C G               | T A T G    | 6.7            |                |               |               |                    |                   |              |                |                   |                   |                  |                   |                  |                                                      |             |                               |                               |           |             |         |
|                      | G C G             | T C C <b>C</b> T <b>G</b> <b>ΔG</b> C C | T A T G    | 3.1            |                |               |               |                    |                   |              |                |                   |                   |                  |                   |                  |                                                      |             |                               |                               |           |             |         |
|                      | G C G             | T C C G T <b>C</b> <b>ΔG</b> C C        | T A G A    | 2.5            |                |               |               |                    |                   |              |                |                   |                   |                  |                   |                  |                                                      |             |                               |                               |           |             |         |
|                      | A C G             | T G C <b>C</b> T C <b>ΔG</b> <b>I</b> G | T A T G    | 1.0            |                |               |               |                    |                   |              |                |                   |                   |                  |                   |                  |                                                      |             |                               |                               |           |             |         |
|                      | A T C             | T G C G C C <b>TT</b> C G               | T C T G    | 12.5           |                |               |               |                    |                   |              |                |                   |                   |                  |                   |                  |                                                      |             |                               |                               |           |             |         |
| CHB,<br>JPT,<br>n=90 | A T C             | T G C G C C <b>TT</b> C G               | T A T G    | 8.3            |                |               |               |                    |                   |              |                |                   |                   |                  |                   |                  |                                                      |             |                               |                               |           |             |         |
|                      | A C C             | T G C G C C <b>TT</b> C G               | T A T G    | 1.7            |                |               |               |                    |                   |              |                |                   |                   |                  |                   |                  |                                                      |             |                               |                               |           |             |         |
| CHB,<br>JPT,<br>n=90 | G C G             | T C C G T G <b>ΔG</b> C C               | T A G A    | 5.5            |                |               |               |                    |                   |              |                |                   |                   |                  |                   |                  |                                                      |             |                               |                               |           |             |         |
|                      | A T C             | T G C G C C <b>TT</b> C G               | T C T G    | 92.8           |                |               |               |                    |                   |              |                |                   |                   |                  |                   |                  |                                                      |             |                               |                               |           |             |         |

**Supplementary Fig. 6.** Activation of the Interferon Stimulated Response Element (ISRE) - Luc reporter in HepG2 cells transiently co-transfected with IFNAN expression constructs carrying either the Halo-tag or a FLAG-tag. Alternatively, cells are transfected with expression constructs for non-functional forms p131 and p107, or an empty vector (mock). Similar activation of ISRE-Luc reporter is induced by IFNAN with both protein tags, while mock, p131 and p107 did not induce any activation. The results represent mean values of 8 biological replicates, with standard errors.

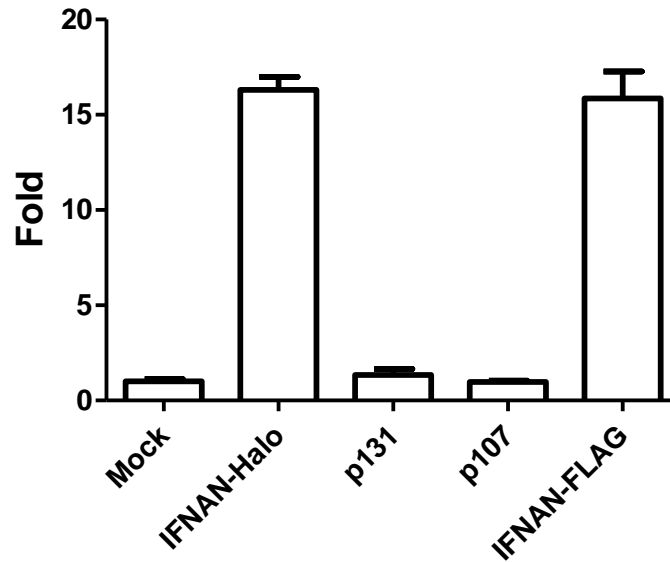



**Supplementary Fig. 7.** Activation of the interferon-stimulated response element (ISRE)-Luc reporter and mRNA expression of receptors for type-I IFNs (*IFNAR1* and *IFNAR2*) and type-III IFNs (*IL28R1* and *IL10R2*) in human cell lines HepG2, 293T and HeLa. Activation of ISRE-Luc reporter was analyzed after transient co-transfection with IFNAN, p131 or p107 expression constructs or after treatment with 10 and 100 ng/ml of IFN- $\alpha$  and IL28B. Results represent mean values of 8 biological replicates, with standard errors. mRNA expression of interferon receptors was evaluated by qRT-PCR assays in non-treated cells and normalized to expression of four endogenous controls; less negative values represent higher mRNA expression. Expression of *IFNAR1*, *IFNAR2* and *IL10R2* was found at comparable levels in all cell lines tested. However, these cell lines differ by the level of expression of *IL28R1*– the highest expression was detected in HepG2 cells, compared to which ~10 fold lower expression was detected in 293T cells and ~50 fold lower expression was detected in HeLa cell line.

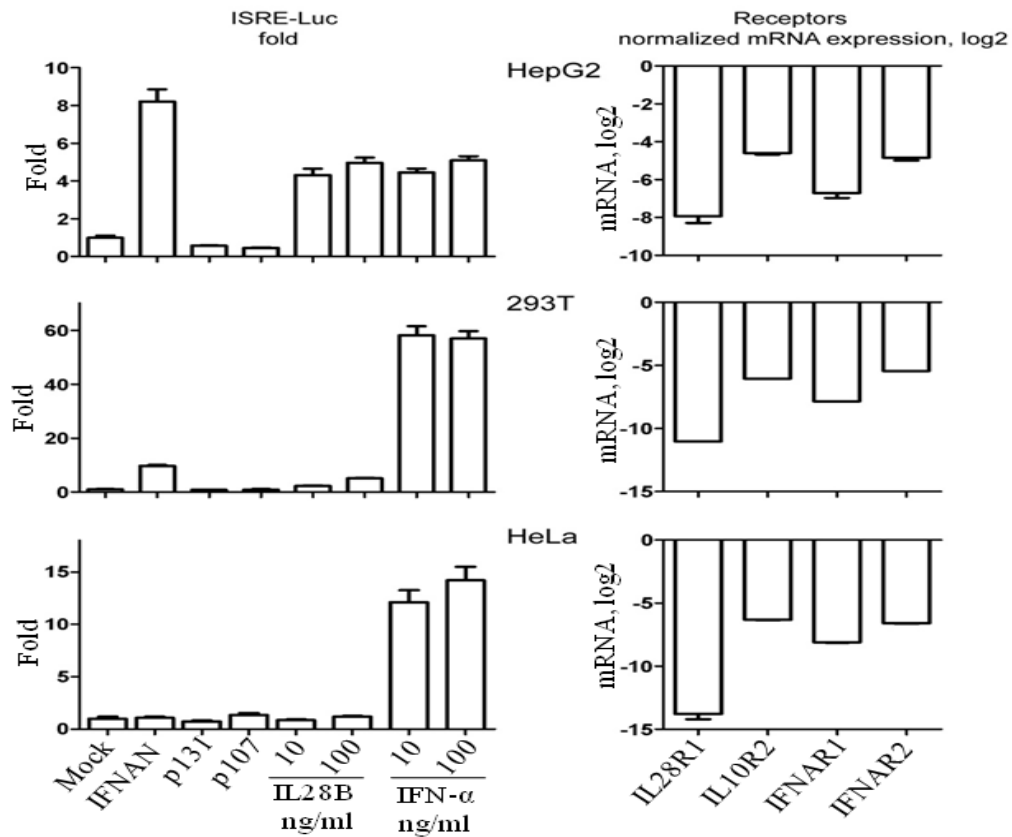

**Supplementary Fig. 8.** Outline of expression constructs for the 6 protein isoforms. Epitopes recognized by the anti-IFNAN mouse and rabbit monoclonal antibodies and the Halo-tag ab are indicated. The mouse monoclonal antibody recognizes IFNAN (p179) and two non-functional proteins, p170 and p131; while the rabbit monoclonal antibody recognizes IFNAN (p179) and two non-functional proteins, p131 and p107. All Halo-tag protein isoforms are recognized with the Halo-tag antibody in cell lysates of transiently transfected hepatoma HepG2 cells.

**a**

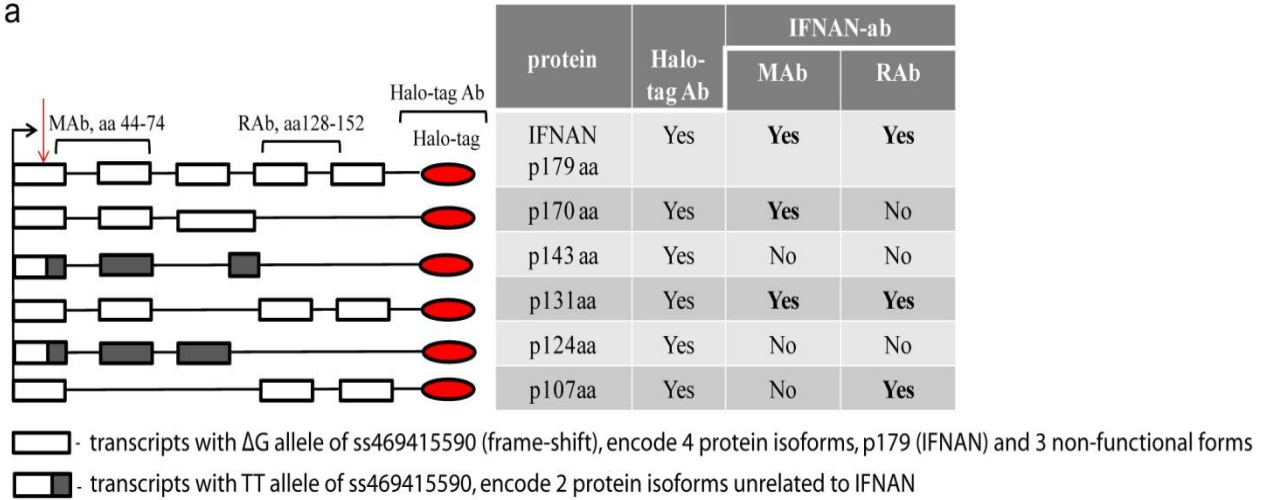

**b**

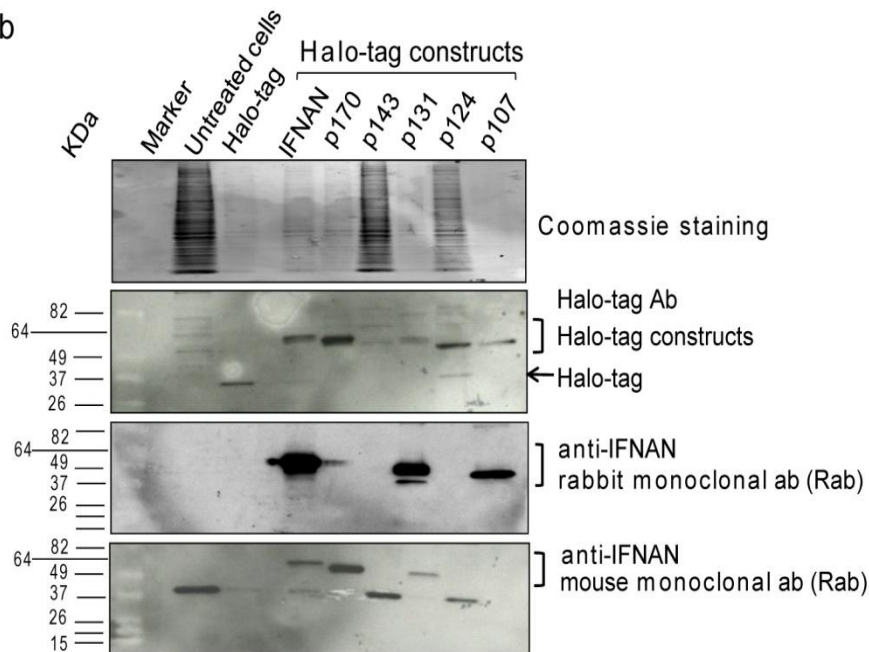

**Supplementary Fig. 9.** Analysis of IFNAN expression in HepG2 cells and primary human hepatocytes.

- a.** Western blot analysis of recombinant purified proteins (IFN- $\alpha$ , IL28B and IFNAN) and lysates of HepG2 cells transfected with IFNAN-Halo expression construct. Expression is detected with the mouse monoclonal anti-IFNAN antibody. IL28B and IFNAN are recombinant purified proteins generated in the sfs9 baculoviral system.
- b.** Confocal imaging with an anti-Halo-tag antibody in HepG2 cells transiently transfected with IFNAN-Halo construct;
- c.** Confocal imaging with a mouse monoclonal anti-IFNAN antibody in HepG2 cells transiently transfected with IFNAN-Halo construct;
- d.** Confocal imaging in primary human hepatocytes from a liver donor not infected with HCV, who was heterozygous for ss469415590  $\Delta$ G/TT genotype. The cells were treated with 50 ug/ml of PolyI:C (the same image as Fig. 5,  $\Delta$ G/TT) or *in-vitro* infected with JFH1-HCV. The detection is performed with a mouse monoclonal anti-IFNAN antibody. Red – IFNAN; green –  $\alpha$ -tubulin (cytoplasm), blue – nuclei. Weak IFNAN expression was detected even in samples not infected with JFH1-HCV (0 h). There was massive cell death in cells infected with JFH1-HCV at 24 h, but the consistency of this observation should be tested in additional samples.

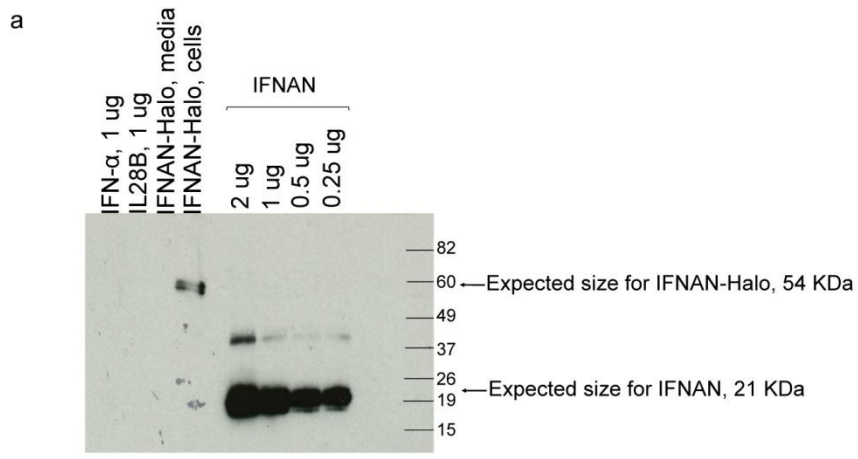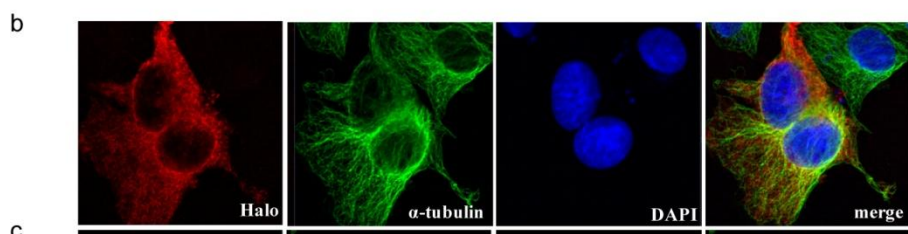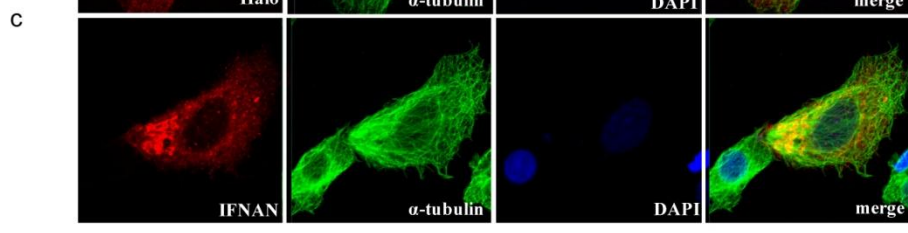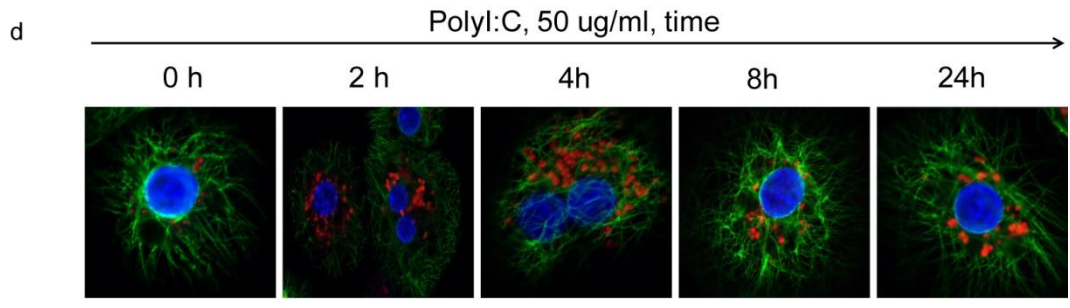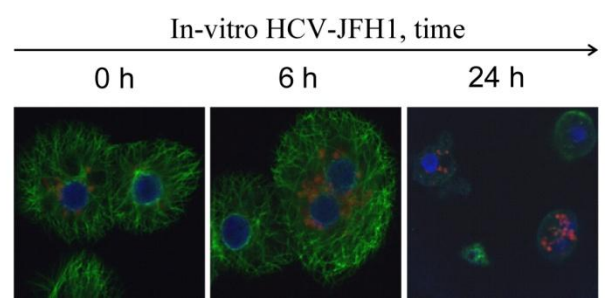

**Supplementary Fig. 10.** Analysis of IFNAN expression in 293T and HepG2 cells transiently transfected with IFNAN-Halo construct or an empty Halo-tag construct.

**a.** The cells and the media were collected 72 hours post-transfection, using one well of 6-well plate per condition. Cells were lysed in 300 ul of RIPA buffer and ~10 ul of each lysate was used per gel lane; cell media was used un-concentrated or concentrated 10x or 100x. Weak secreted IFNAN expression was detected with the rabbit monoclonal anti-IFNAN antibody in HepG2 cells, but not in 293T cells. Very weak or no secreted IFNAN expression was detected with the mouse monoclonal anti-IFNAN or a Halo-tag antibodies.

**b.** Prediction of leader peptides with SignalP4.0 server for secreted proteins IFN- $\alpha$  and IL28B and two allelic forms of IFNAN that carry ss469415590- $\Delta$ G alleles but differ by rs73555604 (Cys17Tyr alleles). The weak leader peptide of IFNAN-Halo construct (with rs73555604, Cys17 variant) indicates that, compared to IFN- $\alpha$  and IL28B, IFNAN has lower secretability.

**a**

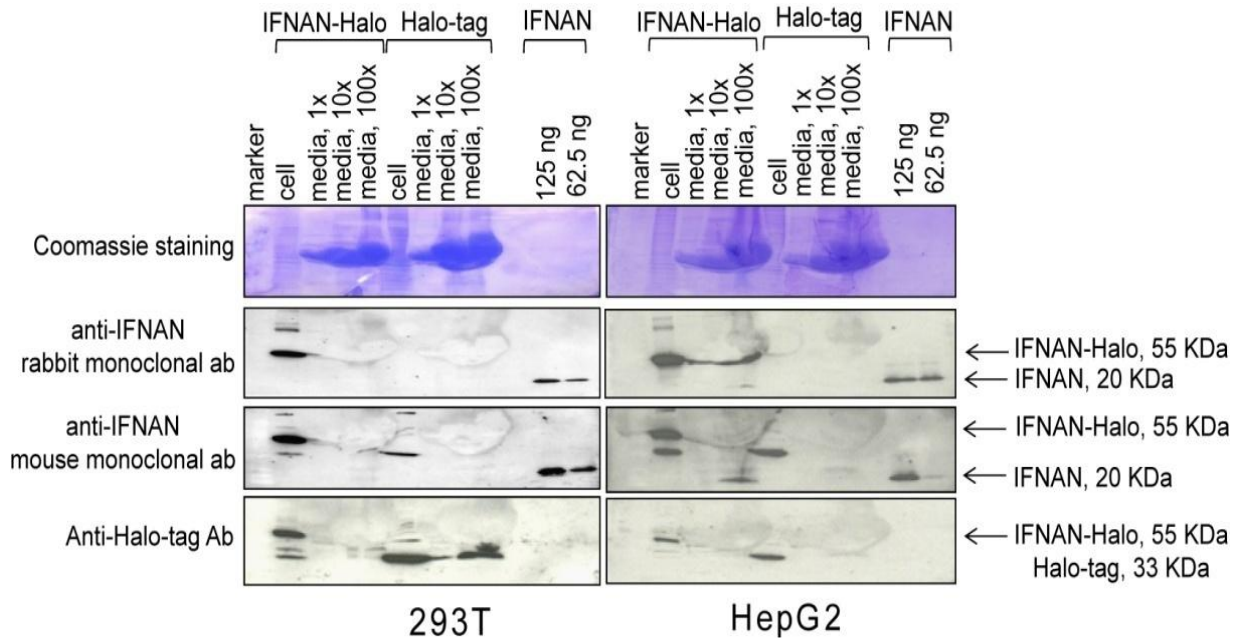

**b**

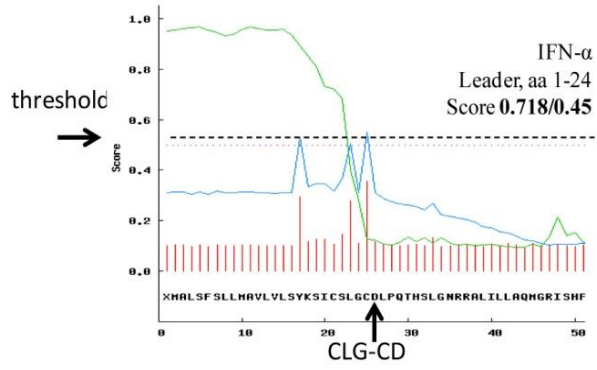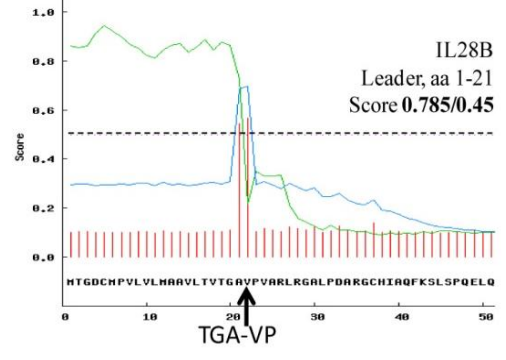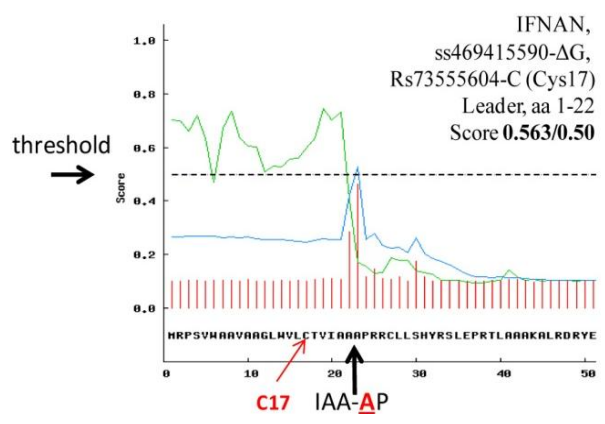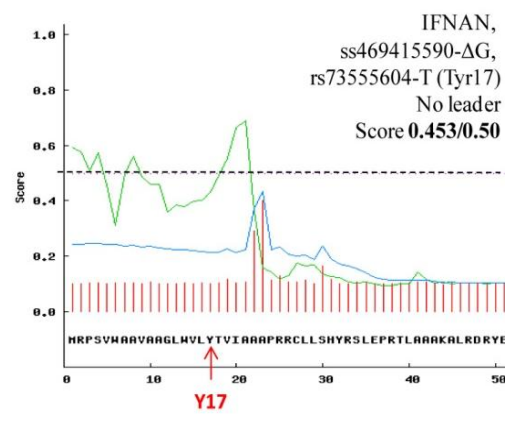

**Supplementary Fig. 11.** Prediction of IFNAN protein based on genomic sequences of 45 species available in UCSC genome browser (genome.ucsc.edu). IFNAN protein is predicted only in the genomes of macaque (marmoset and rhesus), orangutan, chimpanzee and human. Identical amino acids are shaded in black and the positions of human genetic variants are indicated.

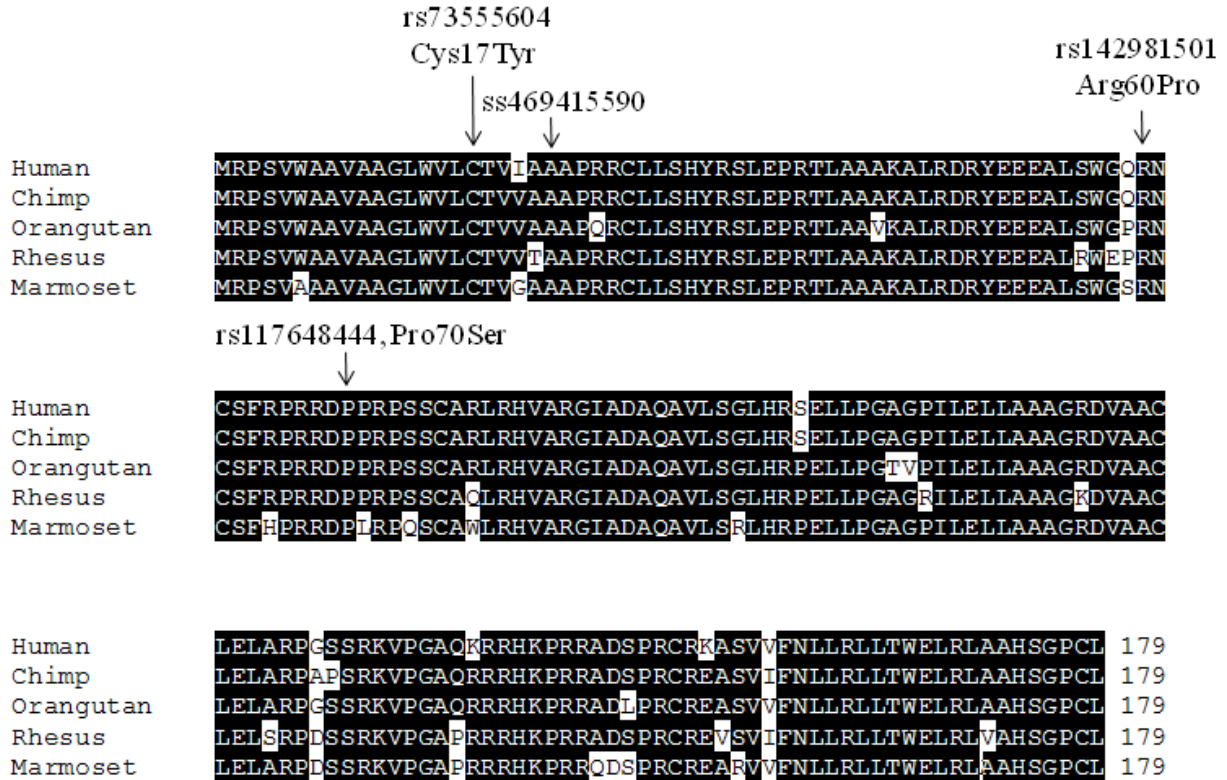

**Supplementary Fig. 12.** Quantitative reverse-transcriptase PCR (qRT-PCR) analysis of allele-specific expression of transcripts with ss469415590-TT and  $\Delta$ G alleles and expression of *IL28B*, *IL29* and *PPIA* (endogenous control) in various samples. Expression is presented on log 2 scale as Ct values (PCR cycle at detection), with higher Ct values corresponding to lower mRNA expression. The fold difference between any two samples can be roughly calculated as  $\text{fold} = 2^{-(Ct_{\text{sample 1}} - Ct_{\text{sample 2}})}$ . Equal amounts of DNase-treated RNA were used for all the assays. Graphs show activation of transcripts carrying both ss469415590 alleles (TT and  $\Delta$ G). Transcripts carrying the risk ss469415590- $\Delta$ G allele generate the functional IFNAN/p179 protein, as well as non-functional proteins p170, p131, p107, while transcripts with the beneficial ss469415590-TT allele generate only non-functional proteins. All the samples were also genotyped for rs12979860 and ss469415590 alleles TT and  $\Delta$ G correspond to rs12979860 alleles C and T. All primary human hepatocytes (PHH) are from liver donors not infected with HCV.

- a. Expression analysis in PHH treated with 50 ug/ml of PolyI:C for 0, 2, 4 and 24 hours. PHH are from liver donors with ss469415590  $\Delta$ G/ $\Delta$ G (n=3), TT/TT (n=5) and TT/ $\Delta$ G (n=3) genotypes.
- b. Expression analysis in PHH *in-vitro* infected with JFH1-HCV for 0, 6 and 24 hours. PHH are from liver donors with ss469415590  $\Delta$ G/ $\Delta$ G (n=1) and TT/TT (n=3) genotypes.
- c. Expression analysis in PHH or HepG2 cells. PHH are from a liver donor with ss469415590  $\Delta$ G/ $\Delta$ G genotype. PHH were untreated or treated with 100 ng/ml of IFN- $\alpha$  or IFN- $\lambda$ . Only IFN- $\alpha$  treatment induced low *IFNAN* expression. HepG2 cells with ss469415590 TT/ $\Delta$ G genotype were treated with 50 ug/ml of PolyI:C for 0, 1, 2, 4, 8 and 24 hours, but no expression of transcripts with either TT or  $\Delta$ G alleles of ss469415590 was induced.



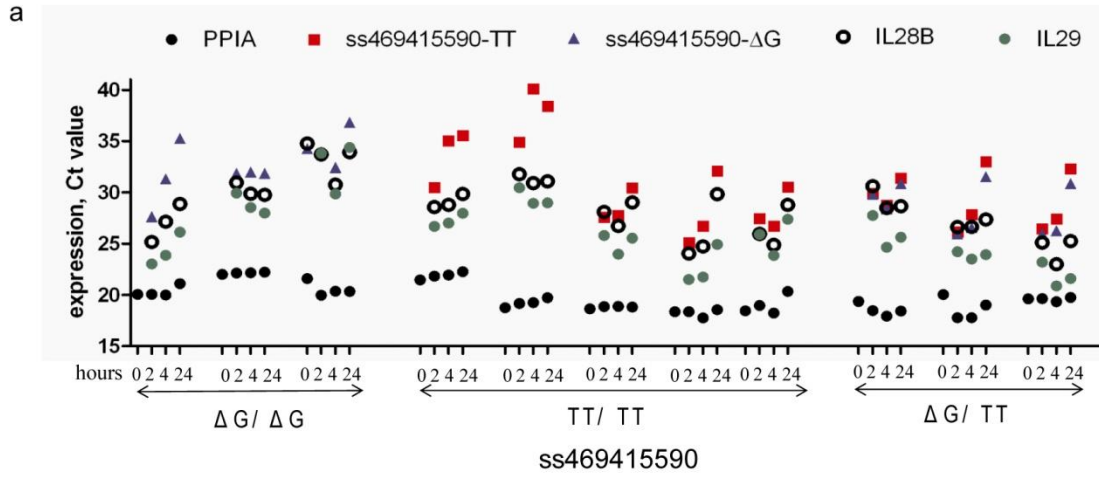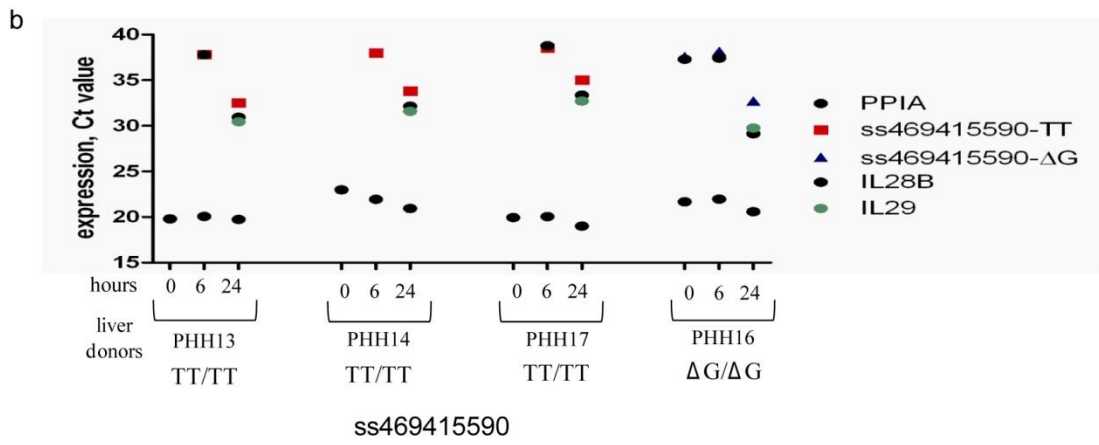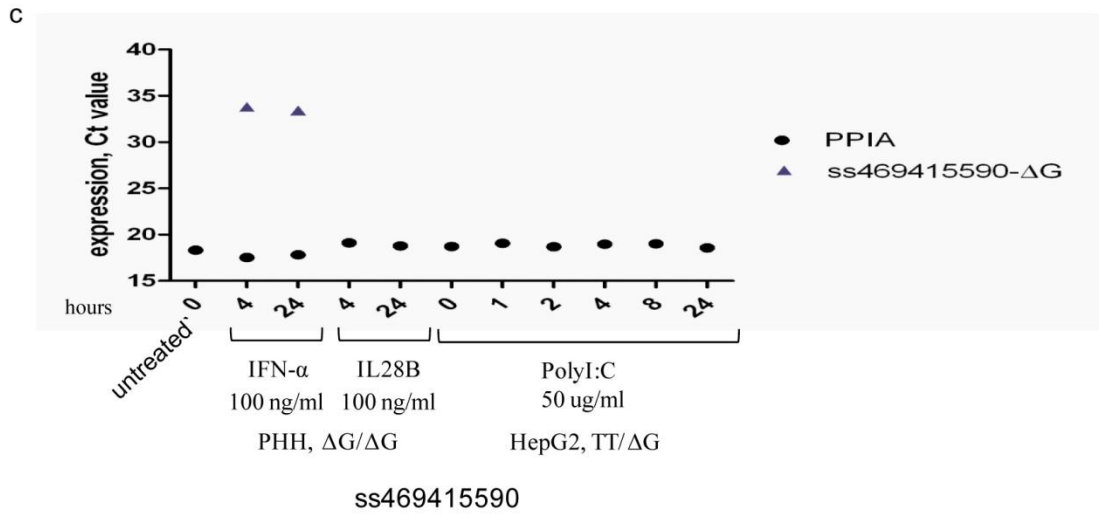

Supplement: NIHMS501386-supplement-SuppFigs.pdf [file NIHMS501386-supplement-SuppFigs.pdf]
