# Supplementary material
Source: PubMed Central journal article supplement (PMC3793390)
Supplement: NIHMS501386-supplement-SuppTables.pdf [file NIHMS501386-supplement-SuppTables.pdf]

**A Genetic Variant Creating a Novel Interferon Analog (IFNAN) Protein is Associated with Impaired Clearance of Hepatitis C Virus**

**Supplementary Table 1.** Description of novel transcripts and proteins identified upstream of *IL28B* gene

| <b>Transcript ID,<br/>NCBI accession<br/>number</b> | <b>Exons</b> | <b>mRNA</b> | <b>Protein</b> | <b>ss469415590<br/>allele</b> | <b>Annotation</b>                            |
|-----------------------------------------------------|--------------|-------------|----------------|-------------------------------|----------------------------------------------|
| IFNAN, p179,<br>JN806234                            | 5            | 1636 bp     | 179 aa         | ΔG                            | *Similarity to IL28B,<br>full-length protein |
| p131, JN806225                                      | 4            | 1492 bp     | 131 aa         | ΔG                            | Similarity to IL28B,<br>full-length protein  |
| p107, JN806226                                      | 3            | 1420 bp     | 107 aa         | ΔG                            | Similarity to IL28B,<br>full-length protein  |
| JN806232                                            | 3            | 1131 bp     | 93 aa          | ΔG                            | No similarity, protein<br>fragment           |
| p170, JN806233                                      | 3            | 915 bp      | 170 aa         | ΔG                            | No similarity, full-<br>length protein       |
| JN806227                                            | 3            | 1637 bp     | 123 aa         | TT                            | No similarity, protein<br>fragment           |
| JN806228                                            | 2            | 1493 bp     | 75 aa          | TT                            | No similarity, protein<br>fragment           |
| JN806229                                            | 1            | 1421 bp     | 51 aa          | TT                            | No similarity, protein<br>fragment           |
| p124, JN806230                                      | 3            | 916 bp      | 124 aa         | TT                            | No similarity, full-<br>length protein       |
| p143, JN806231                                      | 3            | 1132 bp     | 143 aa         | TT                            | No similarity, full-<br>length protein       |

\*Protein similarity is defined based on global protein BLAST search. IFNAN (p179) has highest homology with IL28B – 29.1% amino acid identity and 40.8% amino acid similarity. Protein fragments are open reading frames subjected to nonsense-mediated decay due to the presence of premature stop codons.

**Supplementary Table 2.** Allele frequencies for ss469415590 and GWAS markers rs12979860 and rs8099917 in HapMap populations reference panels. rs8099917 genotypes were downloaded from HapMap ([www.hapmap.org](http://www.hapmap.org)), while ss469415590 and rs12979860 were genotyped in all Hapmap samples. Pair-wise linkage disequilibrium estimates ( $r^2$ ) are between ss469415590 and other markers.

| Variant, allele | HapMap populations              |       |                             |       |                                                            |       |
|-----------------|---------------------------------|-------|-----------------------------|-------|------------------------------------------------------------|-------|
|                 | West-Africans (YRI)<br>30 trios |       | Europeans (CEU)<br>30 trios |       | Asians (Chinese/CHB<br>and Japanese/JPT)<br>90 individuals |       |
|                 | Frequency<br>%                  | $r^2$ | Frequency<br>%              | $r^2$ | Frequency<br>%                                             | $r^2$ |
| ss469415590, TT | 23.3                            | -     | 67.6                        | -     | 93.3                                                       | -     |
| rs12979860, C   | 30.0                            | 0.71  | 67.3                        | 0.92  | 93.3                                                       | 1.00  |
| rs8099917, T    | 97.5                            | 0.008 | 81.7                        | 0.44  | 93.9                                                       | 0.91  |

**Supplementary Table 3.** SNPs from a 100-Kb genomic region in high linkage disequilibrium with ss469415590 ( $r^2 > 0.6$  in YRI or  $r^2 > 0.75$  in other populations) in the 1000 Genomes Project reference panel (<http://www.1000genomes.org>), October 2010 release.

In the 1000 Genomes reference panel ss469415590 (**T**T/**Δ**G) is represented by rs74597329 (**T**/**G**). The GWAS marker rs12979860 is shown in bold.

| Population | Marker                      | Distance (bp) | $r^2$        | Allele 1  | Allele 1 frequency, % | n, chromosomes |
|------------|-----------------------------|---------------|--------------|-----------|-----------------------|----------------|
| CEU        | rs74597329<br>(ss469415590) | 0             | 1            | T<br>(TT) | 74.2                  | 120            |
|            | rs4803222                   | 198           | 0.914        | G         | 74.2                  | 120            |
|            | rs8113007                   | 3948          | 0.874        | A         | 73.3                  | 120            |
|            | rs688187                    | 6403          | 0.846        | G         | 70.8                  | 120            |
|            | rs4803217                   | 4935          | 0.837        | C         | 72.5                  | 120            |
|            | <b>rs12979860</b>           | <b>368</b>    | <b>0.832</b> | <b>C</b>  | <b>74.2</b>           | <b>120</b>     |
|            | rs581930                    | 6032          | 0.802        | C         | 71.7                  | 120            |
| YRI        | rs74597329<br>(ss469415590) | 0             | 1            | T<br>(TT) | 28.0                  | 120            |
|            | <b>rs12979860</b>           | <b>368</b>    | <b>0.658</b> | <b>C</b>  | <b>30.5</b>           | <b>118</b>     |
|            | rs73930703                  | 1642          | 0.642        | C         | 33.1                  | 118            |
| CHB/JPY    | rs74597329<br>(ss469415590) | 0             | 1            | T<br>(TT) | 94.2                  | 120            |
|            | <b>rs12979860</b>           | <b>368</b>    | <b>1</b>     | <b>C</b>  | <b>94.2</b>           | <b>120</b>     |
|            | rs12980275                  | 7372          | 0.85         | A         | 95.0                  | 120            |
|            | rs4803221                   | 26            | 0.764        | C         | 92.5                  | 120            |
|            | rs4803222                   | 198           | 0.764        | G         | 92.5                  | 120            |

**Supplementary Table 4.** Characteristics of the Virahep-C and HALT-C participants

| <b>Characteristic</b>                                            | <b>Virahep-C<br/>(n=351)</b> |           | <b>HALT-C<br/>(n=885)</b> |           |
|------------------------------------------------------------------|------------------------------|-----------|---------------------------|-----------|
| Age (median, IQR)                                                | 48.6                         | 44.0-52.8 | 49                        | 46.0-53.0 |
| Race                                                             |                              |           |                           |           |
| European-Americans (n, %)                                        | 182                          | 51.9      | 741                       | 83.7      |
| African-Americans (n, %)                                         | 169                          | 48.1      | 144                       | 16.3      |
| Male (n, %)                                                      | 230                          | 65.5      | 641                       | 72.4      |
| Ishak Fibrosis Score <sup>b</sup>                                |                              |           |                           |           |
| 2 (n, %)                                                         | 98                           | 27.9      | 68                        | 7.7       |
| 3-4 (n, %)                                                       | 104                          | 29.6      | 495                       | 55.9      |
| 5-6 (n, %)                                                       | 25                           | 7.1       | 321                       | 36.3      |
| HCV Genotype 1 (n, %)                                            | 351                          | 100       | 794                       | 89.7      |
| HCV RNA level (log <sub>10</sub> IU) (median, IQR <sup>a</sup> ) | 6.5                          | 5.6-6.7   | 6.5                       | 6.1- 6.8  |
| Prior treatment:                                                 |                              |           |                           |           |
| None                                                             | 351                          | 100       |                           |           |
| pegIFN- $\alpha$ alone (n, %)                                    | 0                            | 0         | 243                       | 27.5      |
| pegIFN- $\alpha$ /RBV (n, %)                                     | 0                            | 0         | 642                       | 72.5      |

IQR = interquartile range

**Supplementary Table 5.** Characteristics of the UHS and ALIVE participants

| <b>Characteristic</b>                        | <b>Urban Health Study (UHS)</b> |                   |                   |                   | <b>ALIVE</b>      |                 |
|----------------------------------------------|---------------------------------|-------------------|-------------------|-------------------|-------------------|-----------------|
|                                              | European-Americans              |                   | African-Americans |                   | African-Americans |                 |
|                                              | Chronic                         | Cleared           | Chronic           | Cleared           | Chronic           | Cleared         |
| N                                            | 395                             | 162               | 350               | 109               | 590               | 81              |
| Age, median<br>(IQR)                         | 42.0<br>(36 – 48)               | 39.5<br>(33 – 47) | 46.0<br>(42 – 50) | 46.0<br>(42 – 49) | 40<br>(36 – 45)   | 40<br>(36 – 43) |
| Years injection<br>drug use, median<br>(IQR) | 23.0<br>(16 – 29)               | 20.0<br>(11 – 29) | 27.0<br>(21 – 32) | 25.0<br>(19 – 31) | 14<br>(9 – 19)    | 13<br>(8 – 19)  |
| Male (%)                                     | 72.4                            | 67.3              | 62.6              | 60.6              | 76                | 65              |
| HIV-1-infected<br>(%)                        | 12.2                            | 4.9               | 13.1              | 10.1              | 54                | 32              |
| Chronic HBV<br>(%)                           | 3.3                             | 4.3               | 2.9               | 9.2               | 3                 | 7               |

IQR = interquartile range

**Supplementary Table 6.** Comparison of rs12979860 and ss469415590 genotypes for predicting the median decrease in HCV RNA load ( $\log_{10}$  IU/ml) after 28 days of treatment with pegIFN- $\alpha$ /RBV in European-American (EA) and African-American (AA) participants in Virahep-C. Analysis is limited to subjects successfully genotyped for both ss469415590 and rs12979860.

| Race        | Variant     | Genotype               | N  | %    | HCV RNA                                    |                        |               |
|-------------|-------------|------------------------|----|------|--------------------------------------------|------------------------|---------------|
|             |             |                        |    |      | Decrease<br>(Median,<br>$\log_{10}$ IU/ml) | HCV RNA<br>Difference* | p-<br>value** |
| EA<br>n=176 | rs12979860  | TT                     | 19 | 10.8 | 1.14                                       | Ref.                   | .             |
|             |             | CT                     | 78 | 44.3 | 1.57                                       | 0.43                   | 0.03          |
|             |             | CC                     | 79 | 44.9 | 2.99                                       | 1.85                   | 3.4E-07       |
|             | ss469415590 | $\Delta$ G/ $\Delta$ G | 19 | 10.8 | 1.14                                       | Ref.                   | .             |
|             |             | $\Delta$ G/TT          | 78 | 44.3 | 1.57                                       | 0.43                   | 0.03          |
|             |             | TT/TT                  | 79 | 44.9 | 2.99                                       | 1.85                   | 3.4E-07       |
| AA<br>n=162 | rs12979860  | TT                     | 53 | 32.7 | 1.05                                       | Ref.                   | .             |
|             |             | CT                     | 91 | 56.2 | 1.31                                       | 0.26                   | 0.03          |
|             |             | CC                     | 18 | 11.1 | 2.70                                       | 1.64                   | 0.0001        |
|             | ss469415590 | $\Delta$ G/ $\Delta$ G | 67 | 41.4 | 0.87                                       | Ref.                   | .             |
|             |             | $\Delta$ G/TT          | 80 | 49.4 | 1.54                                       | 0.66                   | 8.4E-05       |
|             |             | TT/TT                  | 15 | 9.3  | 2.84                                       | 1.97                   | 6.6E-07       |

\* Difference in median HCV RNA level ( $\log_{10}$  IU/ml) compared to referent genotype

\*\* Kruskal-Wallis test

**Supplementary Table 7.** Comparison of rs12979860 and ss469415590 genotypes for predicting 24-week, end-of-treatment and sustained virological response (SVR) to pegIFN- $\alpha$ /RBV treatment in European-American (EA) and African-American (AA) participants in Virahep-C. Analysis is limited to subjects successfully genotyped for both ss469415590 and rs12979860.

| Race        | Variant     | Genotype               | N  | 24-week Response |      |         | End-of-Treatment Response |      |         | SVR  |      |         |
|-------------|-------------|------------------------|----|------------------|------|---------|---------------------------|------|---------|------|------|---------|
|             |             |                        |    | %                | OR   | p-value | %                         | OR   | p-value | %    | OR   | p-value |
| EA<br>n=182 | rs12979860  | TT                     | 21 | 52.4             | Ref. |         | 33.3                      | Ref. |         | 28.6 | Ref. |         |
|             |             | CT                     | 78 | 74.4             | 2.64 | 0.06    | 67.9                      | 4.24 | 0.006   | 44.9 | 2.03 | 0.18    |
|             |             | CC                     | 83 | 80.7             | 3.81 | 0.01    | 72.3                      | 5.22 | 0.002   | 63.9 | 4.42 | 0.005   |
|             | ss469415590 | $\Delta$ G/ $\Delta$ G | 21 | 52.4             | Ref. |         | 33.3                      | Ref. |         | 28.6 | Ref. |         |
|             |             | $\Delta$ G/TT          | 78 | 74.4             | 2.64 | 0.06    | 67.9                      | 4.24 | 0.006   | 44.9 | 2.03 | 0.18    |
|             |             | TT/TT                  | 83 | 80.7             | 3.81 | 0.01    | 72.3                      | 5.22 | 0.002   | 63.9 | 4.42 | 0.005   |
| AA<br>n=169 | rs12979860  | TT                     | 57 | 40.4             | Ref. |         | 36.8                      | Ref. |         | 24.6 | Ref. |         |
|             |             | CT                     | 93 | 50.5             | 1.51 | 0.23    | 40.9                      | 1.18 | 0.62    | 29.0 | 1.26 | 0.55    |
|             |             | CC                     | 19 | 63.2             | 2.53 | 0.09    | 52.6                      | 1.90 | 0.23    | 36.8 | 1.79 | 0.30    |
|             | ss469415590 | $\Delta$ G/ $\Delta$ G | 71 | 35.2             | Ref. |         | 32.4                      | Ref. |         | 21.1 | Ref. |         |
|             |             | $\Delta$ G/TT          | 82 | 56.1             | 2.35 | 0.01    | 45.1                      | 1.72 | 0.11    | 31.7 | 1.73 | 0.14    |
|             |             | TT/TT                  | 16 | 68.8             | 4.05 | 0.02    | 56.3                      | 2.68 | 0.08    | 43.8 | 2.90 | 0.07    |

OR = Odds Ratio

**Supplementary Table 8.** Comparison of rs12979860 and ss469415590 genotypes for predicting 20-weeks, end-of-treatment and sustained virological response (SVR) to pegIFN- $\alpha$ /RBV treatment in European-American (EA) and African-American (AA) participants enrolled in the HALT-C Trial. Analysis is limited to subjects successfully genotyped for both ss469415590 and rs12979860.

| Race        | Variant     | Genotype               | N   | 20-week Response |       |         | End-of-Treatment Response |       |         | SVR  |       |         |
|-------------|-------------|------------------------|-----|------------------|-------|---------|---------------------------|-------|---------|------|-------|---------|
|             |             |                        |     | %                | OR    | p-value | %                         | OR    | p-value | %    | OR    | p-value |
| EA<br>n=741 | rs12979860  | TT                     | 129 | 15.5             | Ref.  |         | 11.6                      | Ref.  |         | 7.0  | Ref.  |         |
|             |             | CT                     | 425 | 29.7             | 2.30  | 0.002   | 26.6                      | 2.75  | 0.0006  | 14.6 | 2.28  | 0.03    |
|             |             | CC                     | 187 | 66.8             | 10.99 | 1.0E-16 | 58.3                      | 10.61 | 3.8E-14 | 33.7 | 6.77  | 4.4E-07 |
|             | ss469415590 | $\Delta$ G/ $\Delta$ G | 133 | 15.8             | Ref.  |         | 12.0                      | Ref.  |         | 6.8  | Ref.  |         |
|             |             | $\Delta$ G/TT          | 420 | 29.8             | 2.26  | 0.002   | 26.7                      | 2.66  | 0.0007  | 14.8 | 2.39  | 0.02    |
|             |             | TT/TT                  | 188 | 66.5             | 10.58 | 8.9E-17 | 58.0                      | 10.09 | 3.4E-14 | 33.5 | 6.94  | 3.0E-07 |
| AA<br>n=144 | rs12979860  | TT                     | 61  | 9.8              | Ref.  |         | 8.2                       | Ref.  |         | 3.3  | Ref.  |         |
|             |             | CT                     | 72  | 16.7             | 1.83  | 0.26    | 12.5                      | 1.60  | 0.42    | 6.9  | 2.20  | 0.36    |
|             |             | CC                     | 11  | 45.5             | 7.64  | 0.006   | 36.4                      | 6.40  | 0.02    | 27.3 | 11.06 | 0.01    |
|             | ss469415590 | $\Delta$ G/ $\Delta$ G | 68  | 8.8              | Ref.  |         | 7.4                       | Ref.  |         | 2.9  | Ref.  |         |
|             |             | $\Delta$ G/TT          | 68  | 19.1             | 2.44  | 0.009   | 14.7                      | 2.17  | 0.18    | 8.8  | 3.19  | 0.16    |
|             |             | TT/TT                  | 8   | 50.0             | 10.33 | 0.005   | 37.5                      | 7.56  | 0.02    | 25.0 | 11.0  | 0.03    |

OR = Odds Ratio



**Supplementary Table 9.** Association of the GWAS marker rs12979860 and ss469415590 with spontaneous clearance of hepatitis C virus infection among European-American and African-American injection drug users enrolled in the Urban Health Study (UHS). Analysis is limited to subjects successfully genotyped for both ss469415590 and rs12979860.

| Variant                          | Genotype            | Chronic | %    | Clear | %    | OR   | p-value | AUC<br>p-value |
|----------------------------------|---------------------|---------|------|-------|------|------|---------|----------------|
| <b>European-Americans, n=557</b> |                     |         |      |       |      |      |         |                |
| <b>rs12979860</b>                | TT                  | 41      | 10.4 | 6     | 3.7  | Ref. |         | 0.64           |
|                                  | CT                  | 182     | 46.1 | 41    | 25.3 | 1.5  | 0.36    |                |
|                                  | CC                  | 172     | 43.5 | 115   | 71   | 4.6  | 0.0008  |                |
|                                  | Total               | 395     |      | 162   |      |      |         |                |
| <b>African-Americans, n=459</b>  |                     |         |      |       |      |      |         |                |
| <b>rs12979860</b>                | TT                  | 119     | 34.0 | 26    | 23.9 | Ref. |         | 0.58           |
|                                  | CT                  | 183     | 52.3 | 54    | 49.5 | 1.35 | 0.26    |                |
|                                  | CC                  | 48      | 13.7 | 29    | 26.6 | 2.77 | 0.001   |                |
|                                  | Total               | 350     |      | 109   |      |      |         |                |
| <b>ss469415590</b>               | $\Delta G/\Delta G$ | 137     | 39.1 | 26    | 23.9 | Ref. |         | 0.62           |
|                                  | $\Delta G/TT$       | 168     | 48   | 53    | 48.6 | 1.66 | 0.06    |                |
|                                  | TT/TT               | 45      | 12.9 | 30    | 27.5 | 3.51 | 7.9E-05 |                |
|                                  | Total               | 350     |      | 109   |      |      |         |                |

OR = odds ratio for spontaneous clearance;

AUC = area under the receiver operating characteristic curve.

**Supplementary Table 10.** Association of the GWAS marker rs12979860 and ss469415590 with spontaneous clearance of hepatitis C virus infection among African-American injection drug users enrolled in ALIVE study. Analysis is limited to subjects successfully genotyped for both ss469415590 and rs12979860.

| <b>Variant</b>     | <b>Genotype</b>        | <b>Chronic</b> | <b>%</b> | <b>Clear</b> | <b>%</b> | <b>OR</b> | <b>p-value</b> | <b>AUC<br/>p-value</b> |
|--------------------|------------------------|----------------|----------|--------------|----------|-----------|----------------|------------------------|
| <b>rs12979860</b>  | TT                     | 228            | 38.9     | 15           | 19.2     | Ref.      |                | 0.64                   |
|                    | CT                     | 275            | 46.9     | 37           | 47.4     | 2.05      | 0.025          |                        |
|                    | CC                     | 83             | 14.2     | 26           | 33.3     | 4.76      | 7.61E-06       |                        |
|                    | Total                  | 586            |          | 78           |          |           |                |                        |
| <b>ss469415590</b> | $\Delta$ G/ $\Delta$ G | 255            | 43.5     | 19           | 24.4     | Ref.      |                | 0.64                   |
|                    | $\Delta$ G/TT          | 265            | 45.2     | 36           | 46.2     | 1.82      | 0.043          |                        |
|                    | TT/TT                  | 66             | 11.3     | 23           | 29.5     | 4.68      | 5.48E-06       |                        |
|                    | Total                  | 586            |          | 78           |          |           |                |                        |

OR = odds ratio for spontaneous clearance;

AUC = area under the receiver operating characteristic curve.

**Supplementary Table 11. Primers and assays**

| primer                                          | sequence                                               | comments                                                                               |
|-------------------------------------------------|--------------------------------------------------------|----------------------------------------------------------------------------------------|
| IFNAN_cloning_F                                 | ATGCGGCCGAGTGTCTGGGCC                                  | additional overhangs were added for cloning into specific vectors                      |
| IFNAN_cloning_R                                 | GAGGCAAGGCCAGAGTGTGCAG                                 |                                                                                        |
| IFNAN_F_seq_intr1_3'UTR                         | GTAAGTCACCGGTCAGCCCCTGTGCC                             | 1397-bp amplicon for genotyping by sequencing of IFNAN variants within intron 1-exon 5 |
| IFNAN_R_seq_intr1_3'UTR                         | CCCATTGACTGAGAGCCTCGCCCGG                              |                                                                                        |
| IFNAN_ex1_seq_F                                 | CGAACCAGGGTTGAATTGC                                    | 628-bp amplicon for genotyping by sequencing of IFNAN variants within exon 1 and 5'UTR |
| IFNAN_ex1_seq_R                                 | GCACTGCAGACAGGAGTGAG                                   |                                                                                        |
| <b>TaqMan expression assays with MGB probes</b> |                                                        |                                                                                        |
| ss469415590_IFNAN_F                             | GCCTGCTGCAGAAGCAGAGAT                                  | ABI expression buffer                                                                  |
| ss469415590_IFNAN_R                             | GCTCCAGCGAGCGGTAGTG                                    | RNA must be DNaseI-treated                                                             |
| ss469415590_IFNAN_VIC (TT allele)               | ATCGCAG <del>A</del> AGGCC                             |                                                                                        |
| ss469415590_IFNAN_FAM ( $\Delta$ G, allele)     | ATCGCAG <del>C</del> GGCCC                             |                                                                                        |
| IL28B_F                                         | CGGAAGAGGTTGAAGGTGAC                                   | ABI expression buffer                                                                  |
| IL28B_R                                         | CTCCACCATTTGGCTGCAC                                    | RNA must be DNaseI-treated                                                             |
| IL28B_probe (FAM)                               | GCCCCAAAAAAGGA                                         | 182 bp on DNA, 89 bp on cDNA template                                                  |
| IL29                                            | assay Hs00601677_g1, Applied Biosystems                |                                                                                        |
| PPIA (endogenous control)                       | assay 4326316E, Applied Biosystems                     |                                                                                        |
| <b>TaqMan genotyping assays with MGB probes</b> |                                                        |                                                                                        |
| ss469415590_IFNAN_F                             | GCCTGCTGCAGAAGCAGAGAT                                  | standard, Qiagen genotyping buffer                                                     |
| ss469415590_IFNAN_R                             | GCTCCAGCGAGCGGTAGTG                                    |                                                                                        |
| ss469415590_IFNAN_VIC (TT, non-risk allele)     | ATCGCAG <del>A</del> AGGCC                             |                                                                                        |
| ss469415590_IFNAN_FAM (dG, risk allele)         | ATCGCAG <del>C</del> GGCCC                             |                                                                                        |
| rs12979860_F                                    | GCCTGTCTGTACTGAACCA                                    |                                                                                        |
| rs12979860_R                                    | GCGCGGAGTGCAATTCAAC                                    |                                                                                        |
| rs12979860_FAM (T, risk allele)                 | CTGGTTCA <del>A</del> CGCCTTC                          |                                                                                        |
| rs12979860_VIC (C, non-risk allele)             | TGGTTCC <del>G</del> CGCCTTC                           |                                                                                        |
| rs8099917                                       | pre-developed assay C__11710096_10, Applied Biosystems |                                                                                        |
